# Supplementary material for: Tumor microenvironment in a minipig model of spinal cord glioma
Source: Springer Nature journal article supplement (doi:10.1186/s12967-023-04531-7), 2023-09-27

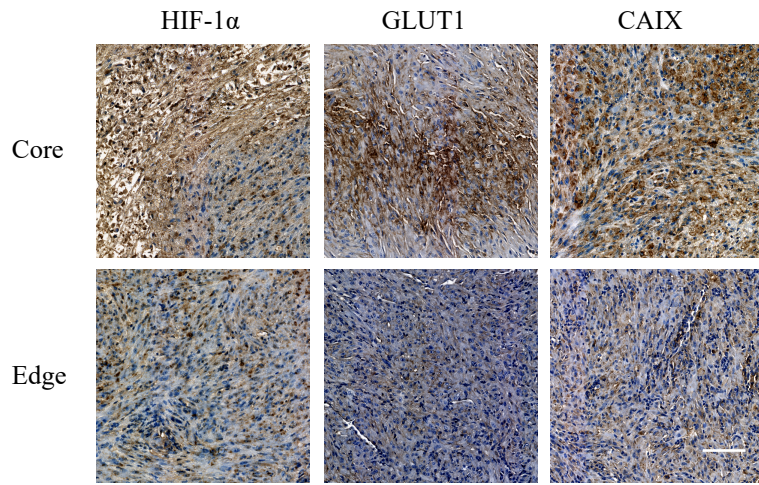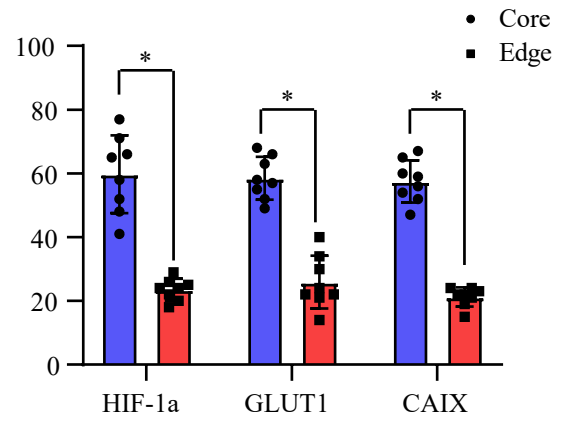

Supplement: MOESM1 [file 26095568]
